# Supplementary material for: White Matter Integrity and Cognitive Impairment in First-Episode Psychosis
Source: Atypon-hosted journal article supplement (doi:10.1176/appi.ajp.2009.09050716), 2010-02-17
Supplement: ajp_167_04_451_01.pdf [file ajp_167_04_451_01.pdf]

Supplementary Table A. Demographic characteristics of first-episode psychotic patients with and without deficit in each cognitive task

|                                | Sex, male |         |    | Age, years |       |      |        | Years of education |      |       | DUP, months |      |        |    |
|--------------------------------|-----------|---------|----|------------|-------|------|--------|--------------------|------|-------|-------------|------|--------|----|
|                                | N         | %       | p  | Median     | Range | Mean | (SD)   | p                  | Mean | (SD)  | p           | Mean | (SD)   | p  |
| <b>Attention task</b>          |           |         |    |            |       |      |        |                    |      |       |             |      |        |    |
| Deficit (n=28)                 | 11        | (39.3%) | NS | 28.07      | 33.79 | 30.1 | (10.2) | NS                 | 10.4 | (3.7) | NS          | 11.4 | (27.1) | NS |
| Nondeficit (n=14)              | 8         | (57.1%) |    | 28.62      | 28.68 | 29.7 | (9.2)  |                    | 11.5 | (3.9) |             | 7.5  | (8.2)  |    |
| <b>Motor task</b>              |           |         |    |            |       |      |        |                    |      |       |             |      |        |    |
| Deficit (n=27)                 | 12        | (44.4%) | NS | 27.14      | 35.71 | 31.3 | (11.6) | NS                 | 9.8  | (3.3) | 0.027       | 10.9 | (18.8) | NS |
| Nondeficit (n=22)              | 11        | (50.0%) |    | 31.15      | 29.08 | 30.9 | (8.0)  |                    | 12.1 | (3.6) |             | 5.8  | (8.0)  |    |
| <b>Verbal memory task</b>      |           |         |    |            |       |      |        |                    |      |       |             |      |        |    |
| Deficit (n=24)                 | 14        | (58.3%) | NS | 32.59      | 34.08 | 33.9 | (10.7) | NS                 | 10.3 | (3.2) | NS          | 9.1  | (9.0)  | NS |
| Nondeficit (n=25)              | 9         | (36%)   |    | 27.30      | 29.28 | 28.5 | (8.8)  |                    | 11.4 | (3.9) |             | 8.1  | (19.3) |    |
| <b>Executive function task</b> |           |         |    |            |       |      |        |                    |      |       |             |      |        |    |
| Deficit (n=30)                 | 13        | (43.3%) | NS | 28.27      | 35.71 | 30.6 | (11.4) | NS                 | 10.1 | (3.8) | 0.050       | 10.3 | (18.0) | NS |
| Nondeficit (n=18)              | 10        | (55.6%) |    | 31.15      | 22.57 | 31.0 | (6.8)  |                    | 12.2 | (3.0) |             | 6.0  | (8.3)  |    |
